# Supplementary material
Source: Springer Nature journal article supplement (https://www.springermedizin.de/resource/supplementary/12911_2005_74_MOESM2_ESM.pdf/9527070)
Supplement: MOESM2 [file 9527070]

**Recommendation 1a: Clinicians should use pneumatic otoscopy as the primary diagnostic method for OME. OME should be distinguished from AOM.**

| <b>Criterion failed / Barrier</b>                                                                                                                       | <b>Specifics</b>                                                            | <b>Suggested Remedy</b>                                                                               |
|---------------------------------------------------------------------------------------------------------------------------------------------------------|-----------------------------------------------------------------------------|-------------------------------------------------------------------------------------------------------|
| 13) Cannot be carried out by current non-performers without substantial increases in provider time, staff, equipment, etc. (Effects on Process of Care) | Pneumatic otoscopy requires acquisition of new equipment for many providers | Approach equipment manufacturers to consider discount coupon for purchase of pneumatic otoscope heads |

**Recommendation 7. Children with persistent OME who are not at risk should be reexamined at 3- to 6-month intervals until the effusion is no longer present, significant hearing loss is identified, or structural abnormalities of the eardrum or middle ear are suspected.**

| <b>Criterion failed / Barrier</b>                                                                                                       | <b>Specifics</b>                                                                   | <b>Suggested Remedy</b>                                                                          |
|-----------------------------------------------------------------------------------------------------------------------------------------|------------------------------------------------------------------------------------|--------------------------------------------------------------------------------------------------|
| 11) The recommended action (what to do) is not stated specifically and unambiguously (Executability)                                    | “3-6 month intervals” is ambiguous                                                 | Define situations when each interval in range is appropriate                                     |
| 22) The recommendation may not be compatible with existing attitudes and beliefs of the guideline’s intended users (Novelty/Innovation) | Surveillance without intervention may not be compatible with practitioner beliefs. | Include specific reference to this topic in continuing education offerings for coming year.      |
| 23) The recommendation may not be consistent with patient expectations (Novelty/Innovation)                                             | Surveillance without intervention may not be compatible with patient expectations  | Prepare leaflets/patient education materials/ press release that validate surveillance decision. |
